# Supplementary material for: Carbohydrate-mediated interactions between chloroviruses and the immune system
Source: PubMed Central journal article supplement — Commun Biol. 2024 Dec 19;7:1670. doi: 10.1038/s42003-024-07244-9 (PMC11659582; doi:10.1038/s42003-024-07244-9), 2024-12-19
Supplement: 42003_2024_7244_MOESM2_ESM.pdf [file 42003_2024_7244_MOESM2_ESM.pdf]

## Supplementary Information for:

### Carbohydrate-Mediated Interactions Between Chloroviruses and the Immune System

Immacolata Speciale<sup>1</sup>, Anna Notaro<sup>1</sup>, Sven Bruijns<sup>2</sup>, Yvette van Kooyk<sup>2</sup>, Ahmed Esmael<sup>3,4</sup>, Antonio Molinaro<sup>1</sup>, Fabio Balzarini<sup>2</sup>, Ernesto Rodriguez<sup>2</sup>, Thomas M. Petro<sup>5</sup>, Irina V Agarkova<sup>4</sup>, Gary L Pattee<sup>6</sup>, James L Van Etten<sup>4</sup>, Cristina De Castro<sup>1\*</sup> and Fabrizio Chiodo<sup>2,7\*</sup>

<sup>1</sup>Department of Chemical Sciences, University of Napoli, via Cintia 21, 80126 Napoli, Italy

<sup>2</sup>Department of Molecular Cell Biology and Immunology, Amsterdam UMC, Vrije Universiteit Amsterdam, Amsterdam, The Netherlands, 1081 HV.

<sup>3</sup>Botany and Microbiology Department, Faculty of Science, Benha University, Benha 13518, Egypt.

<sup>4</sup>Department of Plant Pathology and Nebraska Center for Virology, University of Nebraska-Lincoln, Lincoln NE 69583-0900, United States.

<sup>5</sup>Department of Oral Biology, University of Nebraska Medical Center, Lincoln, NE, United States.

<sup>6</sup>Bryan Health Network, 2631 S. 70<sup>th</sup> Street, Lincoln, NE 68506 and University of Nebraska Medical Center, Omaha, NE 68198, United States.

<sup>7</sup>Institute of Biomolecular Chemistry, National Research Council (CNR), Pozzuoli, Napoli, Italy

\*corresponding authors: Fabrizio Chiodo ([f.chiodo@icb.cnr.it](mailto:f.chiodo@icb.cnr.it)) and Cristina De Castro ([decastro@unina.it](mailto:decastro@unina.it))

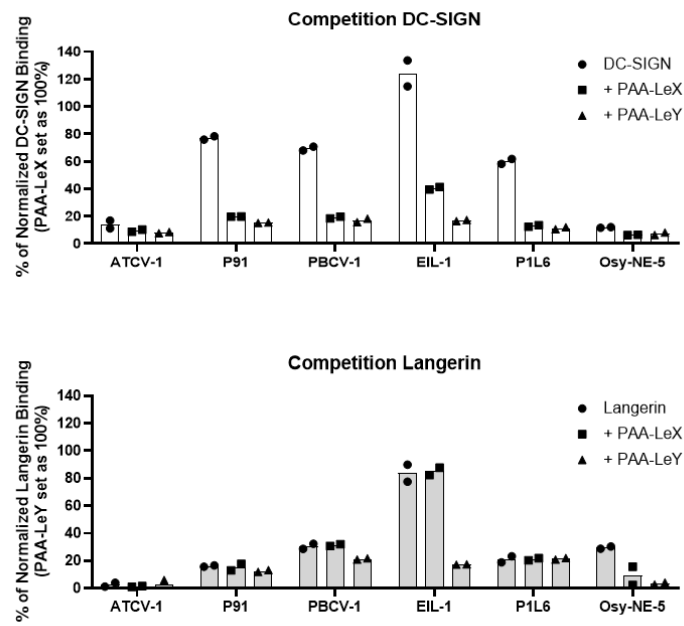

**Fig. S1:** DC-SIGN and Langerin binding-competition assay. DC-SIGN and Langerin were pre-incubated with 10 ug/mL of PAA-LeX or PAA-LeY for 30 minutes at room temperature. After the pre-incubation, lectins were added to the viral glycoproteins coated ELISA wells. The experiments were performed in duplicate, and data are expressed as % of lectins binding setting the PAA-LeX or PAA-LeY as 100%. Error bars indicate standard deviations.

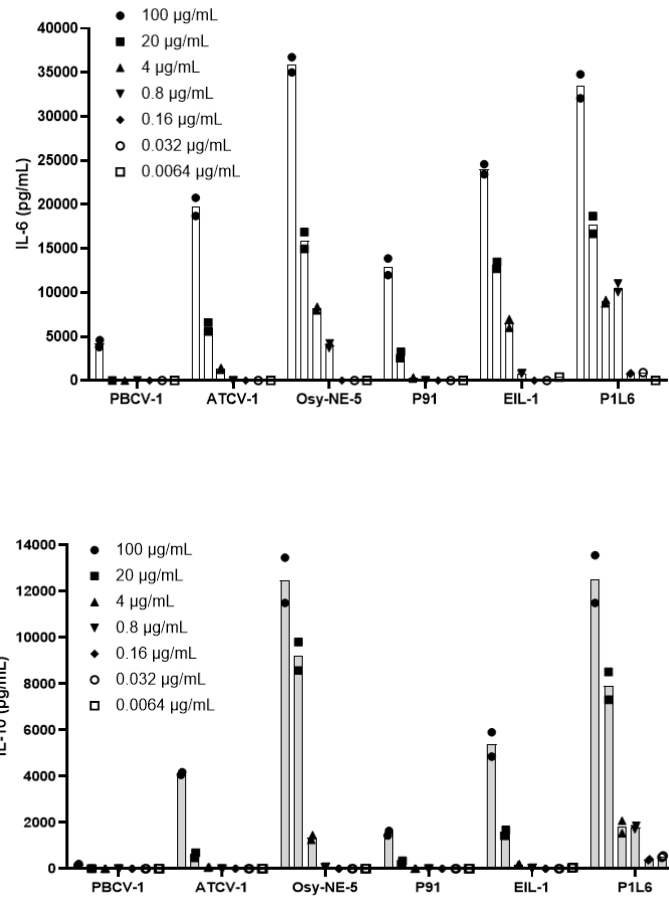

**Fig S2:** IL-6 (upper panel) and IL-10 (lower panel) secretion from human monocytes-derived dendritic cells (n=2) stimulated with different concentration of the studied viral glycoproteins detected via ELISA in the supernatants after 20 h stimulation. Mean values from two different experiments (two different human donors) are reported. Error bars indicate standard deviations.
