# Supplementary material for: Carbohydrate-mediated interactions between chloroviruses and the immune system
Source: PubMed Central journal article supplement — Commun Biol. 2024 Dec 19;7:1670. doi: 10.1038/s42003-024-07244-9 (PMC11659582; doi:10.1038/s42003-024-07244-9), 2024-12-19
Supplement: 42003_2024_7244_MOESM3_ESM.pdf [file 42003_2024_7244_MOESM3_ESM.pdf]

## **Description of Additional Supplementary Files**

File name: Supplementary Data

Description: All the data (numerical source) from the results represented in all the Figures
